# Supplementary material for: Multitarget Molecular Imaging in Metastatic Castration Resistant Adenocarcinoma Prostate Cancer with Therapy Induced Neuroendocrine Differentiation
Source: MDPI journal article supplement (doi:10.3390/diagnostics12061387), 2022-06-03
Supplement: s1 [file s1]

**Table S1 Supplementary.** Neuroendocrine immunohistochemical markers.

| IMMUNOHISTOCHEMICAL MARKERS          |                |                                            | N (%)          |
|--------------------------------------|----------------|--------------------------------------------|----------------|
| <b>Performed in all patients</b>     |                |                                            |                |
| Synaptophysin (+)                    |                |                                            | 8 (100%)       |
| Chromogranin (+)                     |                |                                            | 8 (100%)       |
| <b>Not performed in all patients</b> |                |                                            |                |
| <b>Other analysed markers</b>        | <b>6 (75%)</b> | <b>Patients with no additional markers</b> | <b>2 (25%)</b> |
| PSA (-)                              | 3 (50%)        |                                            |                |
| PSA (-) & Somatostatin (+)           | 1 (16.67%)     |                                            |                |
| CD56 (+), CKAE3 (+)                  | 1 (16.67%)     |                                            |                |
| NKX3 (-) in NEC                      | 1 (16.67%)     |                                            |                |

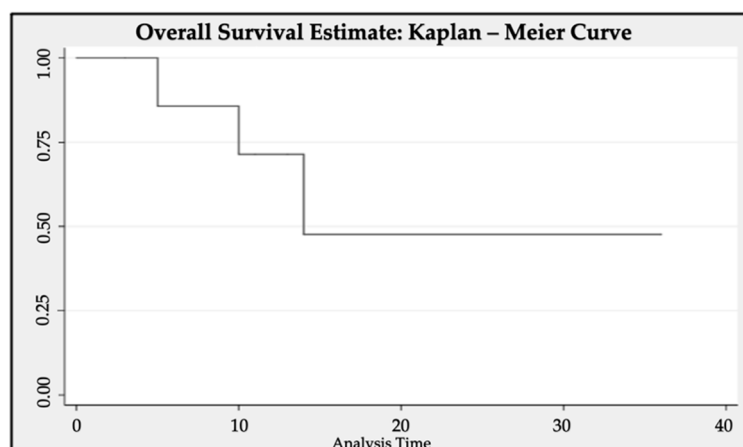

**Figure S1 Supplmenetary. Overall suvival Curves after confirmation of Neurendocrine differentiation**

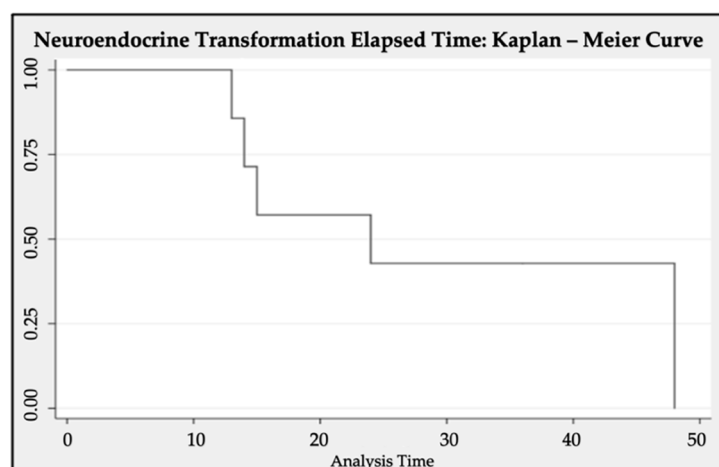

**Figure S2 Supplementary. Time elapsed since diagnostic of prostate adenocarcinoma to Neurendocrine differentiation**
